# Supplementary material for: Electrochemical genosensor based on gold nanostars for the detection of Escherichia coli O157:H7 DNA
Source: Royal Society of Chemistry journal article supplement (doi:10.1039/d2ay00056c), 2022-01-01
Supplement: d2ay00056c1.pdf [file d2ay00056c1.pdf]

## Supporting Data

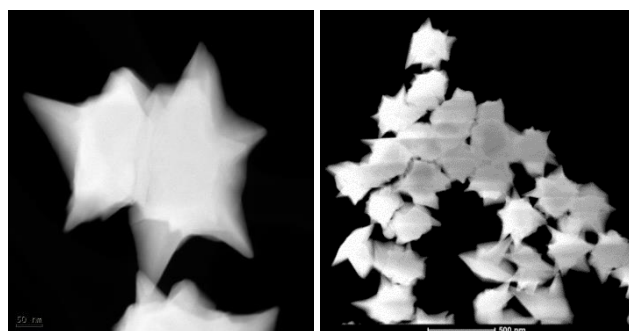

Figure S1: TEM images of AuNSs.

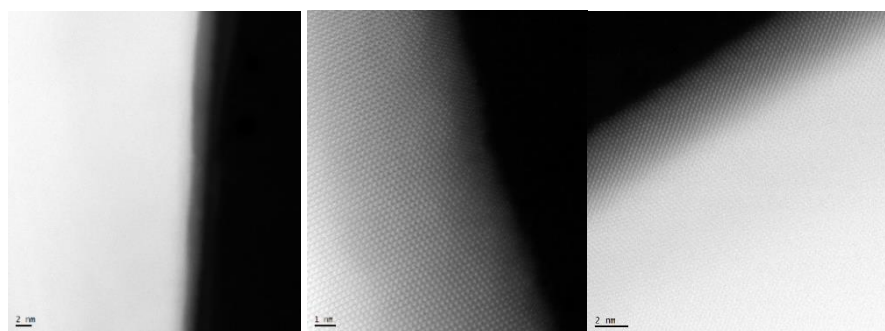

Figure S2: TEM images of AuNSs in atomic scale resolution.

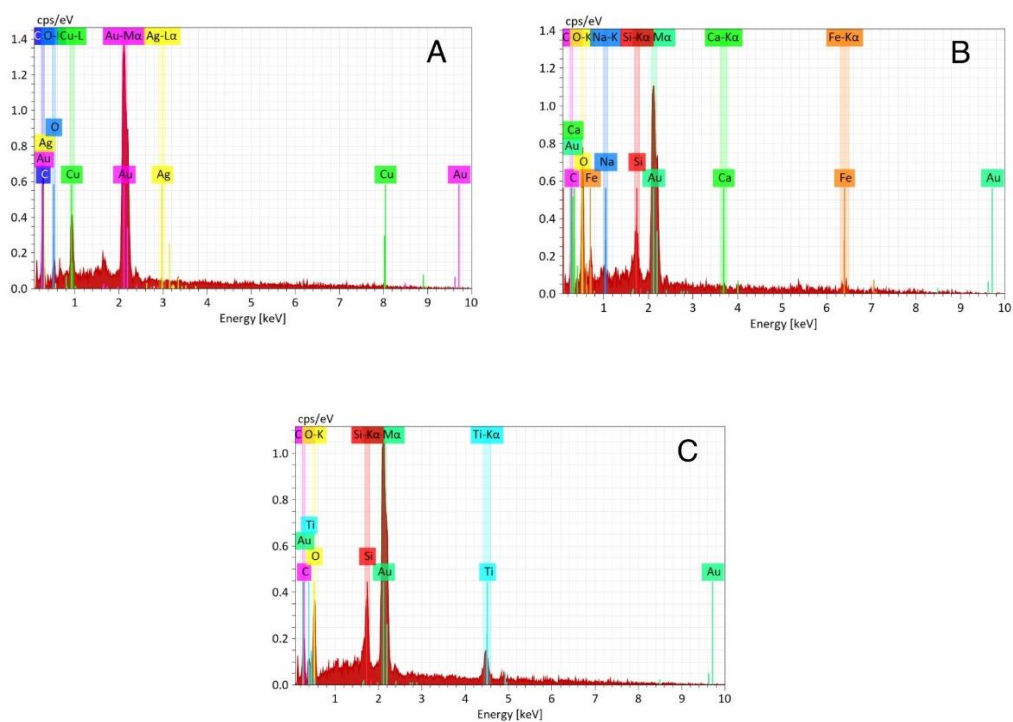

Figure S3: EDX analysis of A) AuNSs modified electrode B) AuNSs-pDNA modified electrode, C) AuNSs-pDNA-cDNA modified electrode.

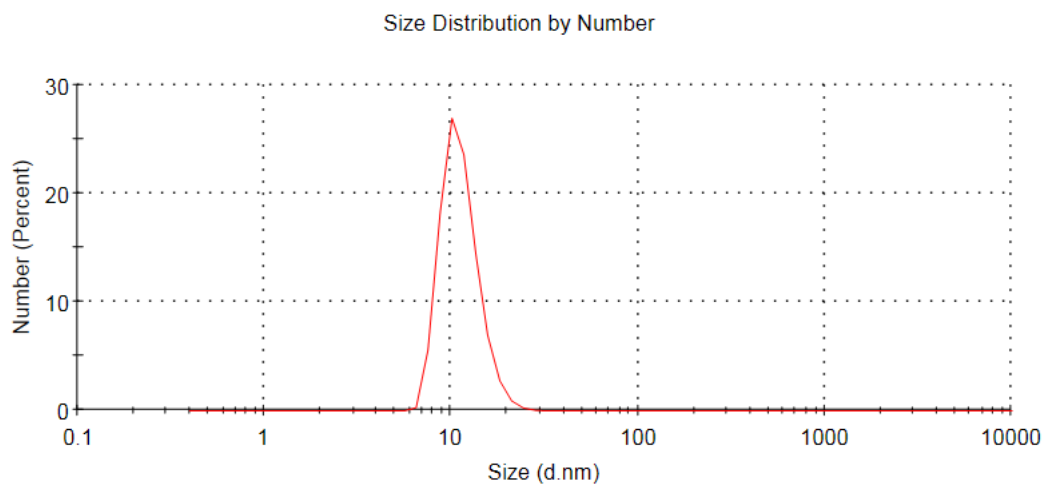

Figure S4: Size distribution analysis of AuNSs by DLS.

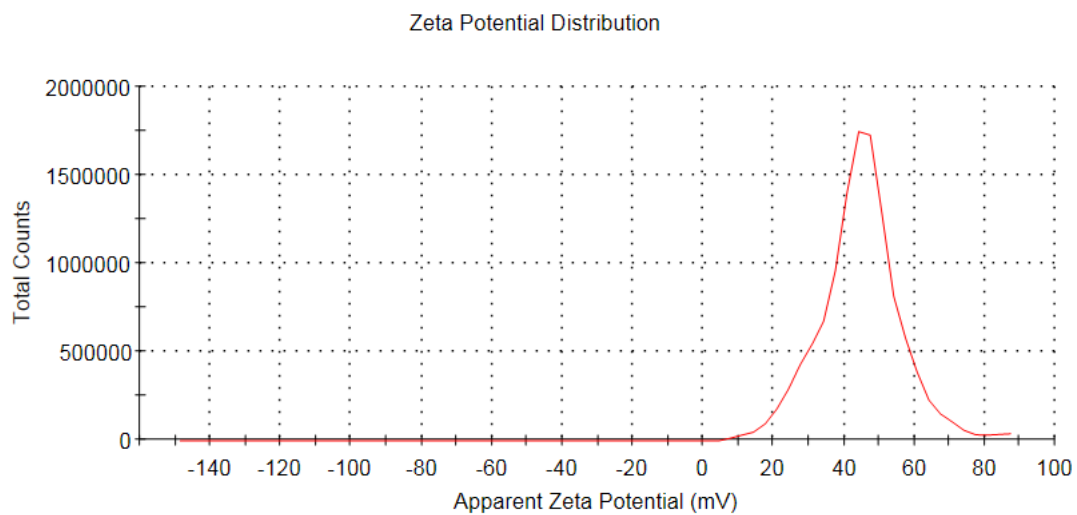

Figure S5: Zeta potential analysis of AuNSs.

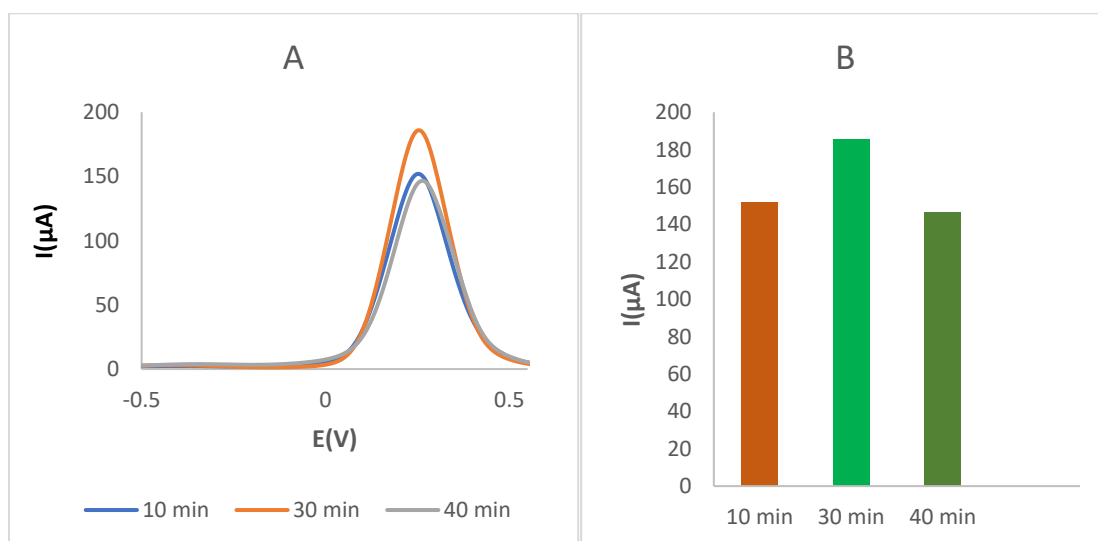

**Figure S6:** A) SWVs of the fabricated genosensor after hybridization in different incubation time of tDNA (10,30 and 40 min). Supporting electrolyte is 0.01 M  $(\text{Fe}(\text{CN})_6^{3/4}\text{-KCl})$ . Step size is 10 mV. B) Histogram of cDNA incubation time.

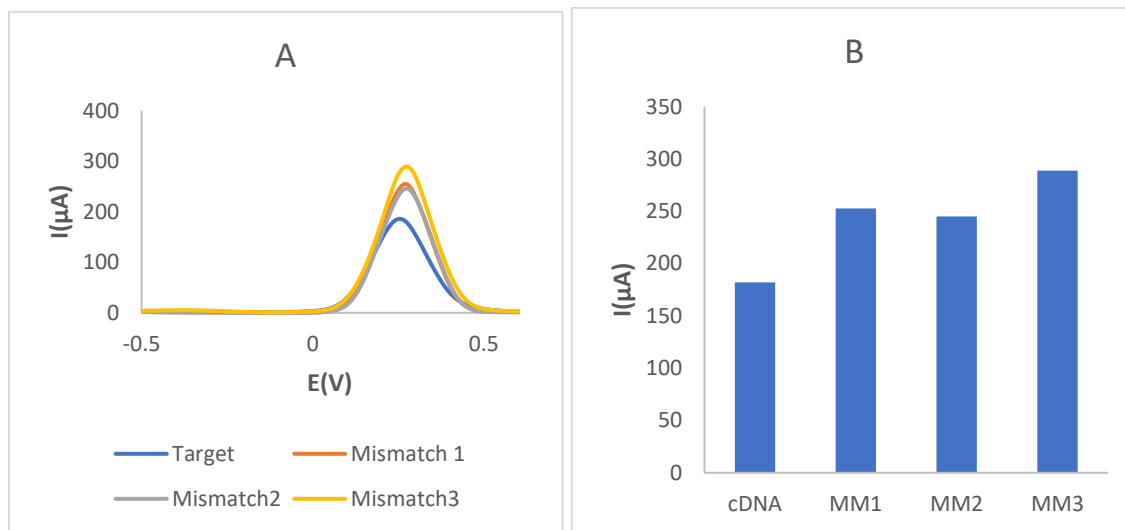

**Figure S7:** A) SWVs ( $E$  step=0.01 V, Amplitude 0.1 V, Frequency 1.0Hz) of the DNA sensor after hybridization by 5 microliter of 7.3  $\mu\text{M}$  cDNA, 7.3  $\mu\text{M}$  1-missmatch DNA, 7.3  $\mu\text{M}$  2-missmatch DNA and 7.3  $\mu\text{M}$  3-missmatch DNA in 0.01 M  $(\text{Fe}(\text{CN})_6^{3/4}\text{-KCl})$ . (Incubation time 30 min at room temperature). B) Histogram of the selectivity study.

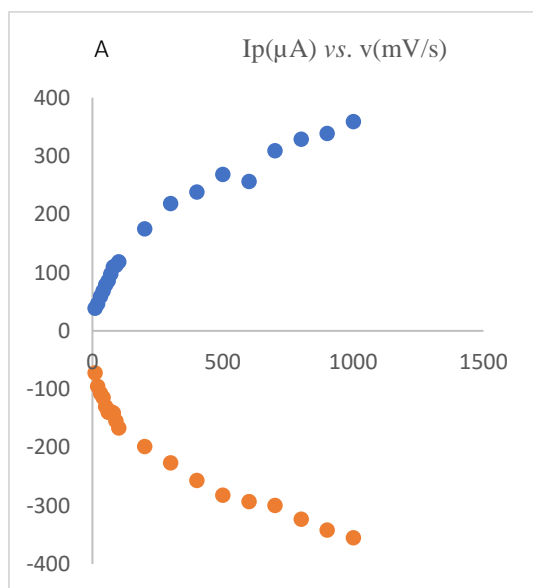

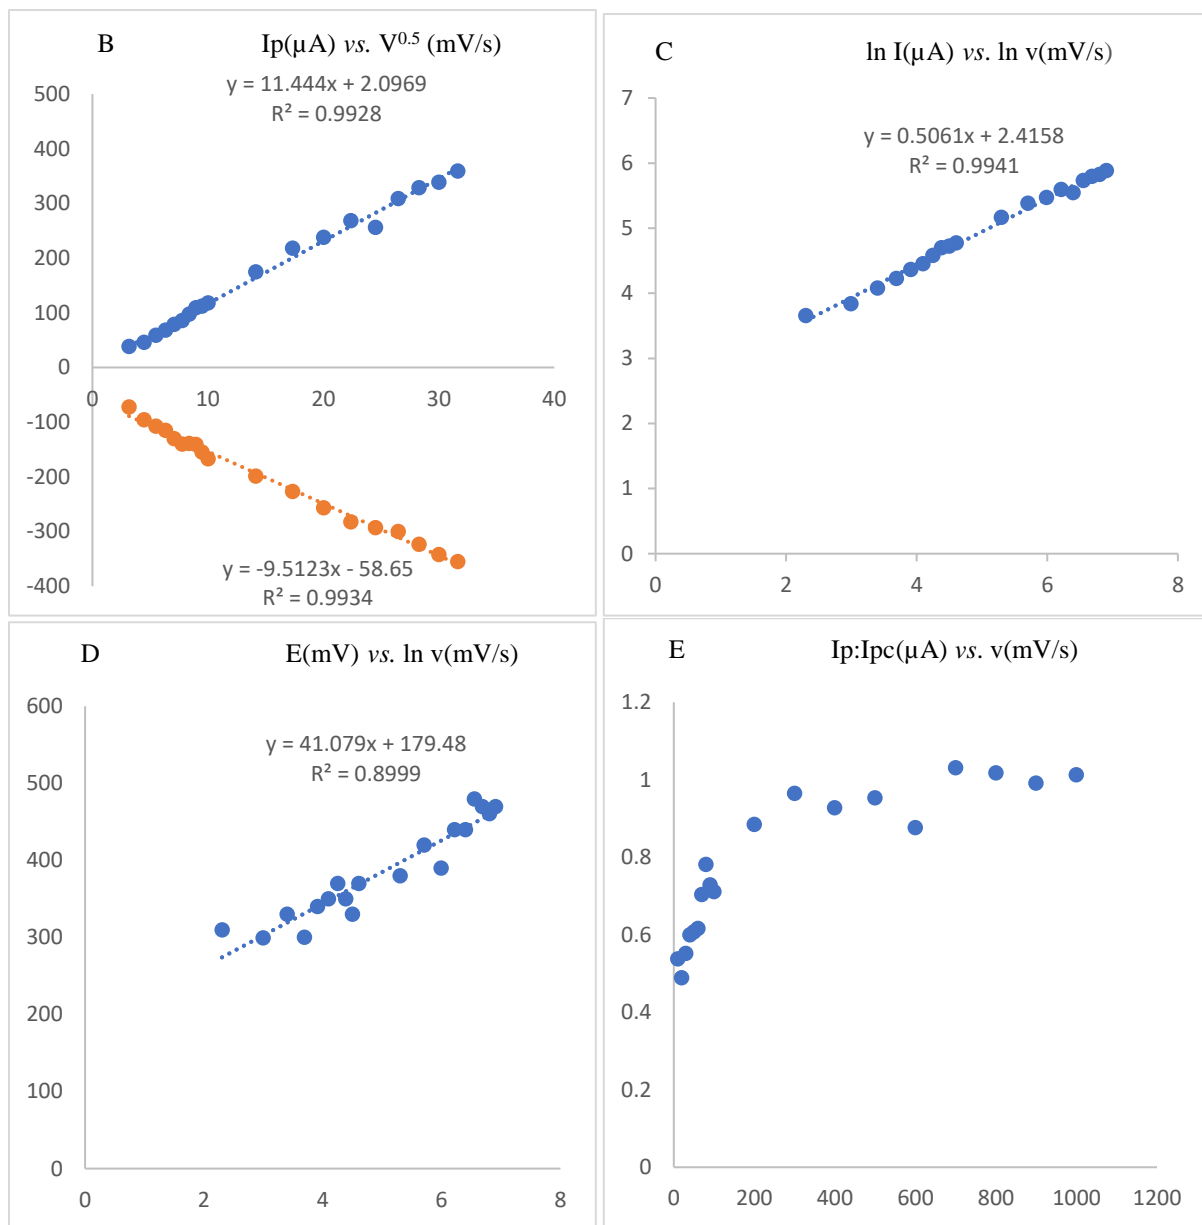

**Figure S8:** A) Dependency of anodic/cathodic peak currents vs. potential sweep rate. B) Dependency of anodic/cathodic peak currents vs. square root of potential sweep rate. C) Dependency of  $\ln I_p$  vs.  $\ln v$ . D) Dependency of  $E_p$  vs.  $\ln v$ . E) Dependency of  $I_p:I_{pc}$ .

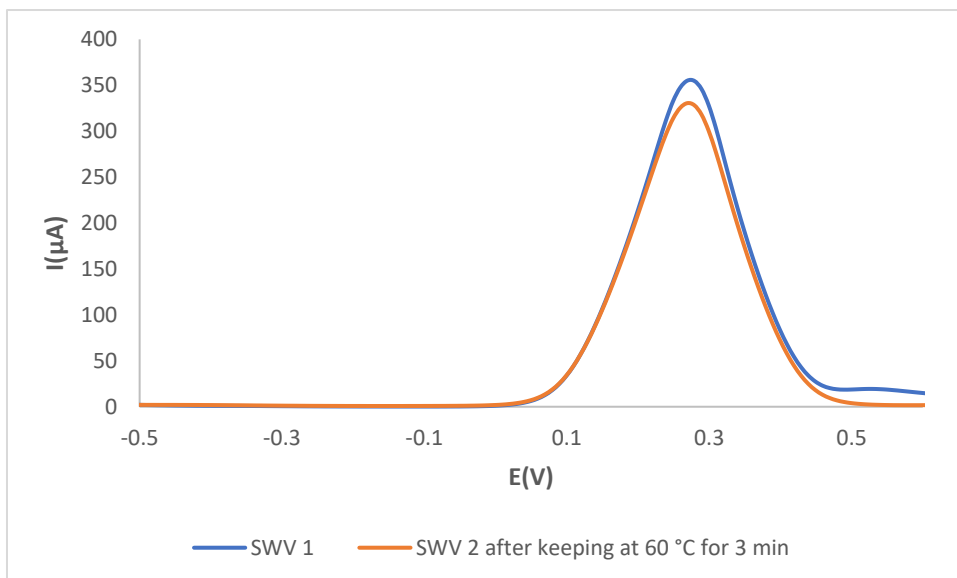

**Figure S9:** Regeneration study: 1) SWV signal of Au-GNSs-pDNA-MCE-TB-tDNA. 2) SWV signal of Au-GNSs-pDNA-MCE-TB-tDNA after keeping at 60 °C for 3 min and after re-hybridization.

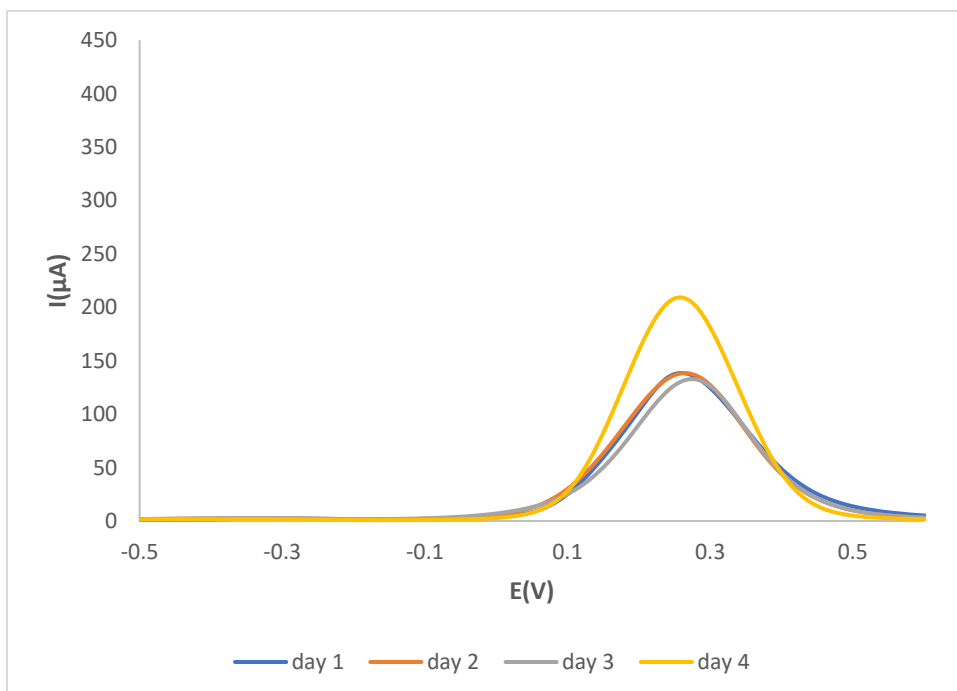

**Figure S10:** Interday stability of the Au/GNSs/pDNA electrode
